# Supplementary material
Source: PubMed Central journal article supplement (PMC3786085)
Supplement: NIHMS482816-supplement-Data_definitions.pdf [file NIHMS482816-supplement-Data_definitions.pdf]

**SUPPLEMENTARY TABLE  
PAD-UCD DATABASE DEFINITIONS  
VERSION OCTOBER 29, 2012**

**Page 1: Demographics**

| <b>Data Element</b> | <b>Definition</b>                                                      |
|---------------------|------------------------------------------------------------------------|
| PtID                | Patient ID, from the identification file                               |
| DOB                 | Date of birth, in mm/dd/yyyy                                           |
| Gender              | Male, female, or unknown                                               |
| Race                | Caucasian, Black, East Asian, South Asian, Hispanic, Other, or Unknown |

**Page 2: Baseline History**

| <b>Data Element</b>         | <b>Definition</b>                                                                                                                                |
|-----------------------------|--------------------------------------------------------------------------------------------------------------------------------------------------|
| PtID                        | Patient ID, from the identification file                                                                                                         |
| Angio Date                  | Initial Angio date, starting with 6/1/2006                                                                                                       |
| PMH CHF                     | History of heart failure, as documented by clinic note or hospital admission                                                                     |
| PMH DM                      | History of DM, as documented by clinic note or HbA1C >7.0                                                                                        |
| PMH HTN                     | History of hypertension, as documented by clinic notes and/or prescription of antihypertensives.                                                 |
| PMH Dyslipidemia            | History of dyslipidemia, as documented by clinic notes and/or taking statins, fibrates, or niacin                                                |
| PMH CAD                     | History of documented CAD (cath, CABG or positive stress test)                                                                                   |
| PMH Stroke/TIA              | History of documented stroke/TIA, as documented by clinic notes or hospital d/c                                                                  |
| PMH ESRD                    | History of CrCl <30                                                                                                                              |
| PMH Malignancy              | History of any malignancy, excluding noninvasive skin cancer                                                                                     |
| PMH COPD                    | History of COPD, as documented by clinic notes or hospital discharge                                                                             |
| PMH Carotid Artery Stenosis | History of carotid artery stenosis, as documented by clinic notes, carotid artery revascularization, or carotid ultrasound showing stenosis >50% |
| PMH GI Bleed                | History of any GI ulcer or bleeding, as documented by clinic notes, discharge, or endoscopy                                                      |
| PMH R leg amputated         | History of right leg amputation (any amputation above the ankle)                                                                                 |
| PMH L leg amputated         | History of left leg amputation (any                                                                                                              |

|                              |                                                                                                      |
|------------------------------|------------------------------------------------------------------------------------------------------|
|                              | amputation above the ankle)                                                                          |
| Weight (kg)                  | Patient's weight in kg, within 3 months pre-procedure                                                |
| Height (cm)                  | Patient's height in cm                                                                               |
| Smoking history at baseline  | Patient's smoking history pre-procedure (never, quit > 3 months ago, current, or unknown)            |
| Attempted smoking cessation  | Whether the patient attempted smoking cessation                                                      |
| Smoking history at 12 months | 12 months post-procedure smoking status                                                              |
| Hormonal therapy             | None, estrogen, progesterone, or combination                                                         |
| DM treatment                 | Treatment of DM with oral medications, insulin, or other injectables.                                |
| HbA1C at first visit         | HbA1C value within 3 months pre-procedure                                                            |
| HbA1C at 12 months           | HbA1C values 9-12 months post-procedure                                                              |
| Creatinine                   | Baseline creatinine, within 3 months pre-procedure                                                   |
| eGFR                         | Automatically calculated                                                                             |
| 1 <sup>st</sup> visit SBP    | SBP in mm Hg within 3 months pre-procedure                                                           |
| SBP at 12 months             | SBP in mm Hg 9-12 months post-procedure                                                              |
| BP ACE                       | Whether patient was prescribed ACE inhibitor within 3 months pre-procedure                           |
| BP ARB                       | Whether patient was prescribed ARB inhibitor within 3 months pre-procedure                           |
| BP Beta Blocker              | Whether patient was prescribed a beta blocker within 3 months pre-procedure                          |
| BP Ca Blocker                | Whether patient was prescribed a calcium channel blocker within 3 months pre-procedure               |
| BP lasix                     | Whether patient was prescribed lasix within 3 months pre-procedure                                   |
| BP thiazide                  | Whether patient was prescribed a thiazide diuretic within 3 months pre-procedure                     |
| BP clonidine                 | Whether patient was prescribed clonidine within 3 months pre-procedure                               |
| BP minoxidil                 | Whether patient was prescribed minoxidil within 3 months pre-procedure                               |
| BP other med                 | Whether patient was prescribed any other anti-hypertensive medications within 3 months pre-procedure |
| Secondary cause of HTN       | Whether patient has a history of pheochromocytoma, renal artery stenosis,                            |

|                              |                                                                                                                                              |
|------------------------------|----------------------------------------------------------------------------------------------------------------------------------------------|
|                              | fibromuscular dysplasia, steroids, or other contribution to HTN                                                                              |
| Pre DUS                      | Whether a duplex ultrasound of the lower extremities was performed within 3 months pre-procedure                                             |
| Pre CTA                      | Whether a CTA of the lower extremities was performed within 3 months pre-procedure                                                           |
| Pre MRA                      | Whether a MRA of the lower extremities was performed within 3 months pre-procedure                                                           |
| Post DUS                     | Whether a DUS of the lower extremities was performed within one year post-procedure                                                          |
| Post CTA                     | Whether a CTA of the lower extremities was performed within one year post-procedure                                                          |
| Post MRA                     | Whether a MRA of the lower extremities was performed within one year post-procedure                                                          |
| TC at baseline               | Total cholesterol within 6 months pre-procedure                                                                                              |
| LDL at baseline              | LDL within 6 months pre-procedure                                                                                                            |
| HDL at baseline              | HDL within 6 months pre-procedure                                                                                                            |
| TG at baseline               | Triglycerides within 6 months pre-procedure                                                                                                  |
| TC at 1 year                 | Total cholesterol within 6-12 months post-procedure                                                                                          |
| LDL at 1 year                | LDL within 6-12 months post-procedure                                                                                                        |
| HDL at 1 year                | HDL within 6-12 months post-procedure                                                                                                        |
| TG at 1 year                 | Triglycerides within 6-12 months post-procedure                                                                                              |
| Statin                       | Type of statin the patient is prescribed                                                                                                     |
| Other lipid med              | Any other lipid medications the patient is prescribed                                                                                        |
| Other lipid med2             | Any other lipid medications the patient is prescribed, if they are prescribed an additional two.                                             |
| Reason not on statin         | If patient has an indication for a statin, reason they are not taking it.                                                                    |
| Walking exercise recommended | Whether walking exercise was recommended (applies to patients with claudication). If this is not definitely documented, list it as "unknown" |
| Aspirin                      | Whether patient taking aspirin pre-procedure                                                                                                 |

|                                                |                                                                                |
|------------------------------------------------|--------------------------------------------------------------------------------|
| Clopidogrel                                    | Whether patient taking clopidogrel pre-procedure                               |
| Ticlopidine                                    | Whether patient taking ticlopidine pre-procedure                               |
| Prasugrel                                      | Whether patient taking prasugrel pre-procedure                                 |
| Cilostazol                                     | Whether patient taking cilostazol pre-procedure                                |
| Coumadin                                       | Whether patient taking coumadin pre-procedure                                  |
| Aggrenox                                       | Whether patient taking aggrenox pre-procedure                                  |
| Pentoxifylline                                 | Whether patient taking pentoxifylline pre-procedure                            |
| Other antiplatelet/antithrombotic              | Whether patient taking any other antiplatelet or antithrombotic pre-procedure  |
| Aspirin at 12 months                           | Whether patient taking aspirin at 9-12 months                                  |
| Clopidogrel at 12 months                       | Whether patient taking clopidogrel at 9-12 months                              |
| Ticlopidine at 12 months                       | Whether patient taking ticlopidine at 9-12 months                              |
| Prasugrel at 12 months                         | Whether patient taking prasugrel at 9-12 months                                |
| Cilostazol at 12 months                        | Whether patient taking cilostazol at 9-12 months                               |
| Coumadin at 12 months                          | Whether patient taking coumadin at 9-12 months                                 |
| Aggrenox at 12 months                          | Whether patient taking aggrenox at 9-12 months                                 |
| Pentoxifylline at 12 months                    | Whether patient taking pentoxifylline at 9-12 months                           |
| Other antiplatelet/antithrombotic at 12 months | Whether patient taking any other antiplatelet or antithrombotic at 9-12 months |

**Page 3: Angiography**

| <b>Data Element</b> | <b>Definition</b>                                                                                                                                                                                                                                                                                                                                           |
|---------------------|-------------------------------------------------------------------------------------------------------------------------------------------------------------------------------------------------------------------------------------------------------------------------------------------------------------------------------------------------------------|
| Patient ID          | Patient ID, from the identification file                                                                                                                                                                                                                                                                                                                    |
| Date of Admission   | Admission Date for the associated angiogram                                                                                                                                                                                                                                                                                                                 |
| Date of Discharge   | Discharge date for the associated angiogram                                                                                                                                                                                                                                                                                                                 |
| Date Symptom Onset  | Date of symptom onset based on clinic or H&P notes. If date is a year, use 6/1/20xx. If date is months, use x/1/20xx. If note states “several months” of symptoms, date the symptoms as three months prior to the clinic visit. If note states “several years,” date the symptoms as 6/1/20xx, where xx is three years before the year of the clinic visit. |
| Presentation        | Symptoms at presentation, based on clinic notes                                                                                                                                                                                                                                                                                                             |
| Rutherford          | Rutherford Classification of symptoms (see appendix). Applies only to lower extremity disease.<br>Rutherford class 1 = Mild claudication. Pain after walking more than 2 blocks<br>Rutherford class 2 = Moderate claudication. Pain after walking 1-2 blocks<br>Rutherford class 3 = Severe claudication. Pain after walking less than a block              |
| Right ABI           | Right ankle brachial index up to 3 months pre-procedure                                                                                                                                                                                                                                                                                                     |
| Right TBI           | Right toe brachial index up to 3 months pre-procedure                                                                                                                                                                                                                                                                                                       |
| Left ABI            | Left ankle brachial index up to 3 months pre-procedure                                                                                                                                                                                                                                                                                                      |
| Left TBI            | Left toe brachial index up to 3 months pre-procedure                                                                                                                                                                                                                                                                                                        |
| Angio Date          | Date of angiogram                                                                                                                                                                                                                                                                                                                                           |
| Type of Procedure   | Diagnostic, single vessel intervention, or multi-vessel intervention                                                                                                                                                                                                                                                                                        |
| Procedure Urgency   | Elective, urgent, or emergency                                                                                                                                                                                                                                                                                                                              |
| Access Site         | Access site, based on procedure description and/or angiogram. If a left sided lower extremity was intervened on from a right sided access, it’s retrograde arterial access                                                                                                                                                                                  |
| Closure Device      | If sheath left in at end of procedure, it is manual compression                                                                                                                                                                                                                                                                                             |

|                          |                                                                                                                                      |
|--------------------------|--------------------------------------------------------------------------------------------------------------------------------------|
| Fluoro time (min)        | Total fluoroscopy time in minutes                                                                                                    |
| Contrast volume (mL)     | Total contrast used in mL                                                                                                            |
|                          |                                                                                                                                      |
| Procedural Success       | If diagnostic only, indicate. If intervention, success is defined as <30% stenosis in all target vessels at conclusion of procedure. |
| Access Site Complication | Whether there was an access site complication at the conclusion of the procedure.                                                    |
| Transfusion              | Whether a blood transfusion was necessary during the procedure.                                                                      |
| Death in Lab             | Whether the patient died during the procedure                                                                                        |
| Stroke in Lab            | Whether patient suffered a stroke during the procedure                                                                               |
| MI in Lab                | Whether the patient had an MI during the procedure                                                                                   |
| Contrast Reaction        | Whether a contrast reaction occurred                                                                                                 |
| Other Complication       | Write-in any other complication                                                                                                      |

**Page 4: Intervention**

| <b>Data Element</b>     | <b>Definition</b>                                                                                                                                                                             |
|-------------------------|-----------------------------------------------------------------------------------------------------------------------------------------------------------------------------------------------|
| Target Lesion 1         | Target lesion for intervention                                                                                                                                                                |
| Length (mm)             | Approximate lesion length, based on angiography                                                                                                                                               |
| TASC Class              | TASC II class, if applicable                                                                                                                                                                  |
| Calcification           | Semi-quantitative calcification score of the lesion, based on angiography                                                                                                                     |
| Thrombus                | Whether there was thrombus in the target lesion                                                                                                                                               |
| Chronic occlusion       | Whether the lesion was a chronic occlusion                                                                                                                                                    |
| Max dia (mm)            | Maximal diameter of vessel, based on balloon sizing                                                                                                                                           |
| Restenosis intervention | Whether the intervention was performed for restenosis (due to in-stent restenosis or POBA restenosis)                                                                                         |
| Stent placed            | Whether a stent was placed                                                                                                                                                                    |
| PTA                     | Whether just balloon angioplasty was performed                                                                                                                                                |
| Cutting balloon         | Whether a cutting balloon was used                                                                                                                                                            |
| Atherectomy             | Whether atherectomy was used                                                                                                                                                                  |
| Thrombolysis            | Whether thrombolysis was used                                                                                                                                                                 |
| Aspiration              | Whether aspiration thrombectomy was performed                                                                                                                                                 |
| Angiojet                | Whether angiojet was used                                                                                                                                                                     |
| Type stent              | If a stent was placed, the type of stent used (see appendix)                                                                                                                                  |
| Cryotherapy             | Whether cryotherapy was used                                                                                                                                                                  |
| Other technique         | Whether another technique was used (write-in)                                                                                                                                                 |
| Complication            | Whether a complication occurred in the target vessel. Dissection counts as a complication if it lead to prolonged balloon inflation and/or placement of a stent as treatment for bifurcation. |
| Success?                | Whether there was procedural success (<30% stenosis at conclusion)                                                                                                                            |

**Page 5: Outcomes**

| <b>Data Element</b>          | <b>Definition</b>                                                                                    |
|------------------------------|------------------------------------------------------------------------------------------------------|
| Patient ID                   | Patient ID, from the identification file                                                             |
| Angio Date                   | Date of the associated angiogram                                                                     |
| Date last follow-up          | Date of last available follow-up in the electronic medical record                                    |
| Death                        | Whether patient died by point of last follow up                                                      |
| Date Death                   | Date of Death. If patient is known to be dead but date of death unknown, list the date as "1/1/1900" |
| MI                           | Whether an MI occurred during the follow up period                                                   |
| Date MI                      | Date of MI                                                                                           |
| Stroke                       | Whether a stroke occurred during the follow up period                                                |
| Date stroke                  | Date of stroke                                                                                       |
| Right limb loss (above foot) | Whether right limb loss occurred during follow up, above the foot (i.e., a TMA does not count)       |
| Date right limb loss         | Date of limb loss                                                                                    |
| Left limb loss (above foot)  | Whether left limb loss occurred during follow up, above the foot (i.e., a TMA does not count)        |
| Date left limb loss          | Date of limb loss during follow up period                                                            |
| Post R ABI 0-30 day          | R Ankle brachial index at 0-30 day follow up                                                         |
| Post R TBI 0-30 day          | R toe brachial index at 0-30 day follow up                                                           |
| Post L ABI 0-30 day          | L Ankle brachial index at 0-30 day follow up                                                         |
| Post L TBI 0-30 day          | L toe brachial index at 0-30 day follow up                                                           |
| Post Rutherford 30 day       | Rutherford classification at 30 day clinic visit follow up                                           |
| Target Lesion 1              | Identification of target lesion 1                                                                    |
| Lesion 1 12 month patency    | Primary patency, primary assisted patency, secondary patency (see appendix definitions)              |
| Lesion 1 target revasc       | Whether lesion 1 had revascularization during the follow up period                                   |
| Lesion 1 target revasc date  | If target revascularization was performed, date                                                      |
| Lesion 1 urgent revasc       | Whether lesion 1 was revascularized urgently during the follow up period                             |
| Lesion 1 urgent revasc date  | If urgent revascularization was performed, date                                                      |

|                                             |                                                                                                                                                                                   |
|---------------------------------------------|-----------------------------------------------------------------------------------------------------------------------------------------------------------------------------------|
| Lesion 1 peak systolic velocity 0-30 days   | Peak systolic velocity of the vessel at 0-30 days. Take highest PSV value within the lesion segment. If revascularization was performed prior to this measurement, list as "NA"   |
| Lesion 1 0-30 days date                     | The actual date (mm/dd/20yy) on which the follow-up DUS was performed                                                                                                             |
| Lesion 1 0-30 days >50% stenosis            | Whether the official read of the DUS for that vessel was that there was a >50% stenosis (y/n)                                                                                     |
| Lesion 1 peak systolic velocity 4-6 months  | Peak systolic velocity of the vessel at 4-6 months. Take highest PSV value within the lesion segment. If revascularization was performed prior to this measurement, list as "NA"  |
| Lesion 1 4-6 months date                    | The actual date (mm/dd/20yy) on which the follow-up DUS was performed                                                                                                             |
| Lesion 1 4-6 months >50% stenosis           | Whether the official read of the DUS for that vessel was that there was a >50% stenosis (y/n)                                                                                     |
| Lesion 1 peak systolic velocity 9-12 months | Peak systolic velocity of the vessel at 9-12 months. Take highest PSV value within the lesion segment. If revascularization was performed prior to this measurement, list as "NA" |
| Lesion 1 9-12 months date                   | The actual date (mm/dd/20yy) on which the follow-up DUS was performed                                                                                                             |
| Lesion 1 9-12 months >50% stenosis          | Whether the official read of the DUS for that vessel was that there was a >50% stenosis (y/n)                                                                                     |
